# Supplementary material
Source: publisher figshare collection journal article supplement (https://sage.figshare.com/ndownloader/files/14701847)
Supplement: Supplementary file 1 [file 14701847]

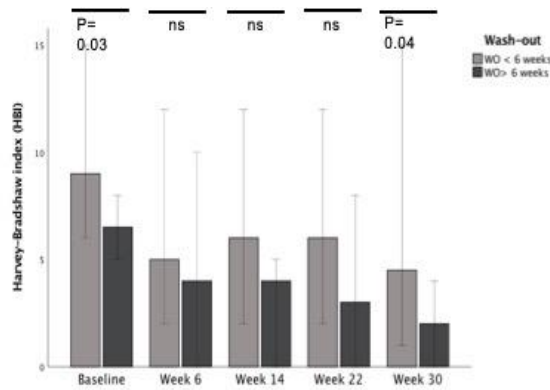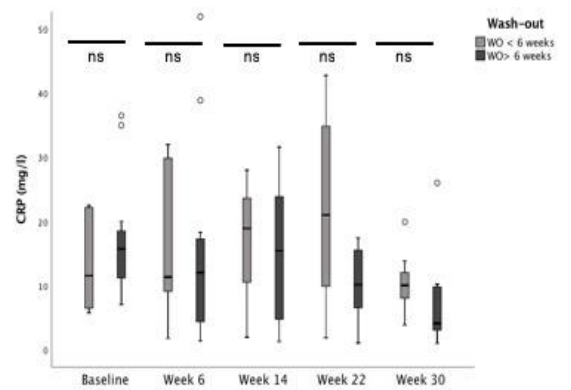

**Supplementary Figure 1A: Median HBI evolution according to wash-out periods.** Median HBI 8.5 (8-12) at baseline, 4.5 (4-10) at week 6, 4.5 (3-9) at week 14, 5 (2-9) at week 22 and 4.5 (4-14) at week 30 for wash-out < 6 weeks. Median HBI at 7 (5.5-8.5), 4 (2-6) at week 6, 4 (1.5-4) at week 14, 3.5 (1-7) at week 22 and 4.5 (0.5-3) at week 30 for wash-out > 6 weeks. P-values were p=0.36 at week 6, p=0.08 at week 14, p=0.13 at week 22 and p=0.04 at week 30.

**B: CRP evolution in Crohn disease patients according to wash-out periods.** Median CRP was 11.5 mg/l (IQR 5.8-22.5) at baseline, 11.3 mg/l (IQR 7.5-32) at week 6, 18.9 mg/l (IQR 3.6-24.7) at week 14, 21 mg/l (IQR 2.3-36.2) at week 22 and 10 mg/l (IQR 6.2-13.8) at week 30 for wash-out < 6 weeks. Median CRP was 14.4 mg/l (IQR 10.5-18.4) at baseline, 11.2 mg/l (IQR 3.5-17.2) at week 6, 15.4 mg/l (IQR 4.1-28.1) at week 14, 10.1 mg/l (IQR 4.7-16.4) at week 22 and 3.5 mg/l (IQR 2.9-9.7) at week 30 for wash-out > 6 weeks. P-values were p=0.72 at baseline, p=0.72 at week 6, p=1 at week 14, p=0.3 at week 22 and p=0.08 at week 30.

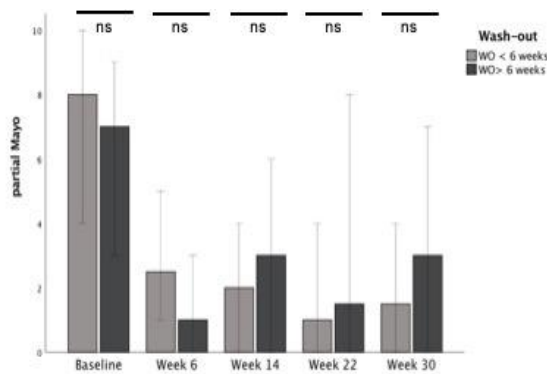

**Supplementary Figure 2 partial Mayo evolution according to wash-out periods.** Median partial Mayo at 10 (8-11) at baseline, 3 (1-3) at week 6, 2 (1-3) at week 14, 2 (0-3) at week 22 and 3 (0-3) at week 30 for wash-out < 6 weeks. Median partial Mayo at 8.5 (5-10.5), 1 (0-2.5) at week 6, 3 (1-5) at week 14, 1.5 (0.5-5) at week 22 and 3 (1.5-5) at week 30 for wash-out > 6 weeks. P-values were p=0.71 at baseline, p=0.21 at week 6, p=0.71 at week 14, p=0.76 at week 22 and p=0.48 at week 30.
